# Supplementary material
Source: publisher figshare collection journal article supplement (https://acs.figshare.com/ndownloader/files/5455541)
Supplement: Supplementary file 1 [file 5455541]

## Supporting information

### ACS APPLIED MATERIALS & INTERFACES

#### Color-Tunable and Highly Luminous $\text{N}^{3-}$ -doped $\text{Ba}_{2-x}\text{Ca}_x\text{SiO}_{4-6}\text{N}_{2/36}:\text{Eu}^{2+}$ ( $0.0 \leq x \leq 1.0$ ) Phosphors for White NUV-LED

Donghyeon Kim,<sup>†</sup> Jong-Seong Bae,<sup>§</sup> Tae Eun Hong,<sup>§</sup> Kwun Nam Hui,<sup>⊥</sup> Sungyun Kim,<sup>||</sup>

Chang Hae Kim,<sup>¶</sup> Jung-Chul Park<sup>†,\*,\*</sup>

<sup>†</sup> Graduate School of Advanced Engineering, Silla University, Busan 46958, Republic of Korea

<sup>‡</sup> Center for Green Fusion Technology and Department of Engineering in Energy & Applied Chemistry, Silla University, Busan 46958, Republic of Korea

<sup>§</sup> Busan Center, Korea Basic Science Institute, Busan 46742, Republic of Korea

<sup>⊥</sup> Institute of Applied Physics and Materials Engineering, University of Macau, Avenida da Universidade, Taipa, Macau, China

<sup>||</sup> Institute of NT.IT Fusion Technology, Ajou University, Suwon 16499, Republic of Korea

<sup>¶</sup> Advanced Materials Division, Korea Research Institute of Chemical Technology (KRICT), 141, Gajeong-ro, Yuseong-gu, Daejeon 34114, Korea

Corresponding: Jung-Chul Park

Center for Green Fusion Technology and Department of Engineering in Energy & Applied Chemistry, Silla University, Busan 617-736, Republic of Korea

Telephone: +82-51-999-5469

Fax number: +82-51-999-5652

E-mail: parkjc@silla.ac.kr

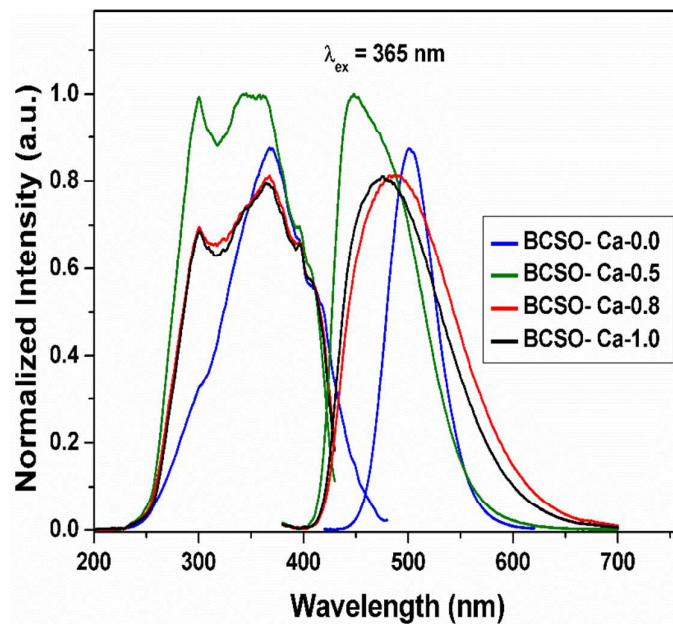

**Figure S1.** Normalized PL spectra of BCSO:Eu<sup>2+</sup> (Ca = 0.0, 0.5, 0.8, 1.0).

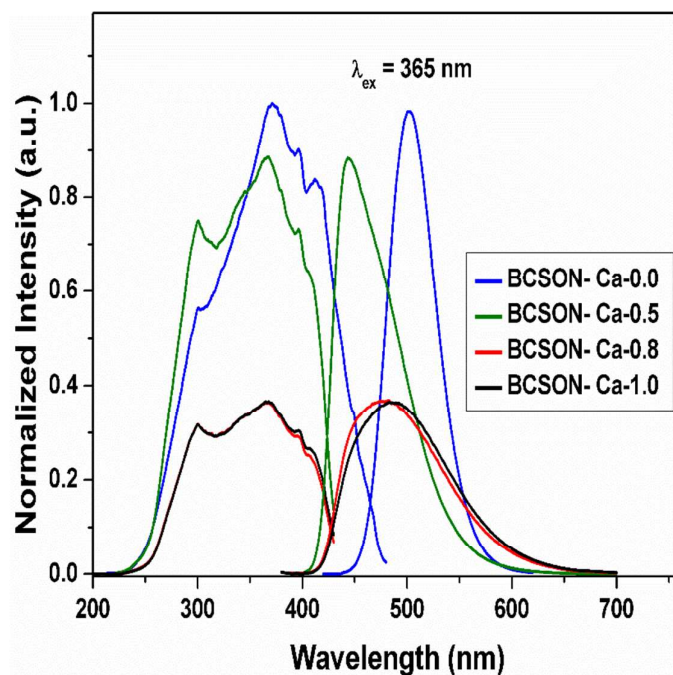

**Figure S2.** Normalized PL spectra of BCSON:Eu<sup>2+</sup> (Ca = 0.0, 0.5, 0.8, 1.0).
